# Supplementary material for: Celecoxib-Loaded Cubosomal Nanoparticles as a Therapeutic Approach for Staphylococcus aureus In Vivo Infection
Source: MDPI journal article supplement (doi:10.3390/microorganisms11092247), 2023-09-06
Supplement: s1 [file s1]

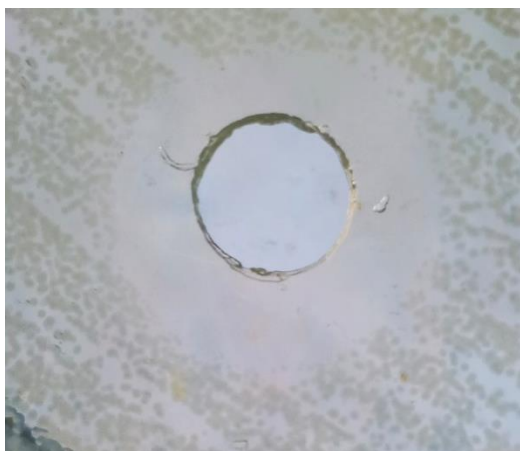

**Figure S1.** Inhibition zone of the studied formula.

| Primer        | Sequence                                                             | Reference |
|---------------|----------------------------------------------------------------------|-----------|
| GAPDH         | 5'-AGAAGG CTGGGGCTCATTTG-3'<br>5'-AGGGGCCAT CCACAGTCTTC-3'           | [1]       |
| COX-2         | 5'-ACA CAC TCT ATC ACT GGC ACC-3'<br>5'-TTC AGG GAG AAG CGT TTG C-3' | [2]       |
| TNF- $\alpha$ | 5'-GCCTCTTCTCATTCCTGCTTG-3'<br>5'-CTGATGAGAGGGAGGCCATT-3'            | [3]       |

**Table S1.** Primer sequences

1. Alotaibi, B.; El-Masry, T. A.; Elekhawy, E.; El-Kadem, A. H.; Saleh, A.; Negm, W. A.; Abdelkader, D. H., Aqueous core epigallocatechin gallate PLGA nanocapsules: Characterization, antibacterial activity against uropathogens, and in vivo reno-protective effect in cisplatin induced nephrotoxicity. *Drug Delivery* **2022**, 29, (1), 1848-1862.
2. Fornai, M.; Blandizzi, C.; Colucci, R.; Antonioli, L.; Bernardini, N.; Segnani, C.; Baragatti, B.; Barogi, S.; Berti, P.; Spisni, R., Role of cyclooxygenases 1 and 2 in the modulation of neuromuscular functions in the distal colon of humans and mice. *Gut* **2005**, 54, (5), 608-616.
3. Yamakawa, I.; Kojima, H.; Terashima, T.; Katagi, M.; Oi, J.; Urabe, H.; Sanada, M.; Kawai, H.; Chan, L.; Yasuda, H., Inactivation of TNF- $\alpha$  ameliorates diabetic neuropathy in mice. *American Journal of Physiology-Endocrinology and Metabolism* **2011**.
